# Supplementary material for: Porphyrin and pyrene-based conjugated microporous polymer for efficient sequestration of CO2 and iodine and photosensitization for singlet oxygen generation
Source: Royal Society of Chemistry journal article supplement (doi:10.1039/c6ra17664j), 2016-01-01
Supplement: c6ra17664j1.pdf [file c6ra17664j1.pdf]

## Supplementary Data

# Porphyrin and Pyrene-Based Conjugated Microporous Polymer for Efficient Sequestration of CO<sub>2</sub>, Iodine and Photosensitization for Singlet Oxygen Generation.

Kyoung Chul Park,<sup>a,†</sup> Jinhee Cho,<sup>a,†</sup> and Chang Yeon Lee<sup>a,\*</sup>

<sup>a</sup>Department of Energy and Chemical Engineering, Incheon National University, Incheon 22012,  
Korea

E-mail: [cylee@inu.ac.kr](mailto:cylee@inu.ac.kr).

<sup>†</sup> These authors contributed equally to this work

## Section 1. Materials and Methods

### Materials and instruments

1,3,6,8-Tetrabromopyrene(97%), Copper( I ) iodide (99.999% trace metals basis), N,N-Dimethylformamide (99.8%, anhydrous), Triethylamine (99.5%), 1,3-diphenylisobenzofuran, iodine was purchased from Aldrich chemicals and used as received. Tetrakis(triphenylphosphine)palladium(0) was purchased G-OLED and used as received. Tetrahydrofuran (99.5%), Chloroform (99.5%), N-Hexane (96%), Dichloromethane (99.5%), Methanol (99.5%) was purchased Daejung and used as received. 5,10,15,20-Tetrakis(4-(ethynylphenyl)porphyrin) was synthesized according to a published procedure.

Powder X-ray diffraction measurements were carried out on a Rigaku smartlab with Cu K $\alpha$  radiation over a range of  $5^{\circ} < 2\theta < 40^{\circ}$  in 0.02 steps with a 1 s counting time per step. SEM images were obtained using a field emission scanning electron microscope (JEOL, JSM-7001F) operated at an acceleration voltage of 15.0kV. Samples were coated with a layer of Pt (~3 nm thickness) prior to imaging.

N<sub>2</sub> adsorption/desorption isotherms were measured volumetrically at 77K in the range of  $7.0 \times 10^{-6} < P/P_0 < 1.00$  with an Autosorb-iQ outfitted with the micropore option from Quantachrome Instruments (Boynton Beach, Florida USA) using the Autosorb-iQ Win software package. The samples were activated at 120°C for 15 h using the outgas port of the Autosorb-iQ instrument. The specific surface areas for N<sub>2</sub> were calculated using the Brunauer-Emmett-Teller (BET) model in the linear range, as determined using the consistency criteria. Pore size distribution was calculated by NLDFIT method in the Autosorb-iQ Win software package. Microporous and mesoporous surface areas were calculated by t-plot method in the range of  $0.2 < P/P_0 < 0.5$ .

The CO<sub>2</sub> adsorption isotherms were obtained using Quantachrome Instruments (Boynton Beach, Florida USA) using the Autosorb-iQ Win software package. The samples were activated at 120°C for 15 h using the outgas port of the Autosorb-iQ instrument. Fourier transform infrared (FTIR) spectrum was recorded on Bruker VERTEX 80V spectrometer. The spectral resolution is 2 cm<sup>-1</sup>. Solid-state NMR experiments were performed on a Bruker Avance II 500 MHz spectrometer. The <sup>13</sup>C CP/MAS NMR spectra were recorded with a 4-mm MAS BB-1H probe and with a sample spinning rate of 5 kHz; a contact time of 2 ms and pulse delay of 5 s were applied. Thermogravimetric analysis (TGA) was performed on a TGA N-1000 by measuring the weight loss while heating at a rate of 3 °C min<sup>-1</sup> from 25 to 950 °C under nitrogen.

## **Synthesis of Por-Py-CMP**

5,10,15,20-Tetrakis(4-(ethynylphenyl)porphyrin) (120 mg, 0.169 mmol), 1,3,6,8-tetrabromopyrene (58.3 mg, 0.113 mmol), Pd(PPh<sub>3</sub>)<sub>4</sub> (39.4 mg), and CuI (6.4mg) were added a 100 mL two-neck round bottom flask. Then 16.3 mL of DMF and 0.33 mL of TEA was added to dissolve all the solid and N<sub>2</sub> bubbling for 10 min. The solution was heated to 100°C for 42 h and then cooled to room temperature. After vacuum filtration and washing with CHCl<sub>3</sub> and MeOH, solid was collected. After Soxhlet extraction with CHCl<sub>3</sub>, THF, and MeOH and drying under vacuum at 100°C overnight.

### **Capture of iodine with Por-Py-CMP**

The sample of Por-Py-CMP powder was placed in a pre-weighted glass vial. The vial and excess solid iodine were put together in a closed system at 350K and ambient pressure. Then, the system was cooled and weighted. The iodine uptake was calculated as  $(m_2 - m_1)/m_1 \times 100 \text{ wt\%}$ , where  $m_1$  and  $m_2$  are the mass of the CMP sample before and after iodine uptake.

### **Singlet oxygen generation**

Visible irradiation was provided using a fiber optic coupled halogen lamp (150W, SCHOTT, KL 1500 compact) combined with a 500 nm long pass filter (semrock). Irradiation of solution of 1,3-diphenylisobenzofuran(37μM) in DMF (3ml) with light in the presence of Por-Py-CMP (2mg) causes a steady generation of singlet oxygen.

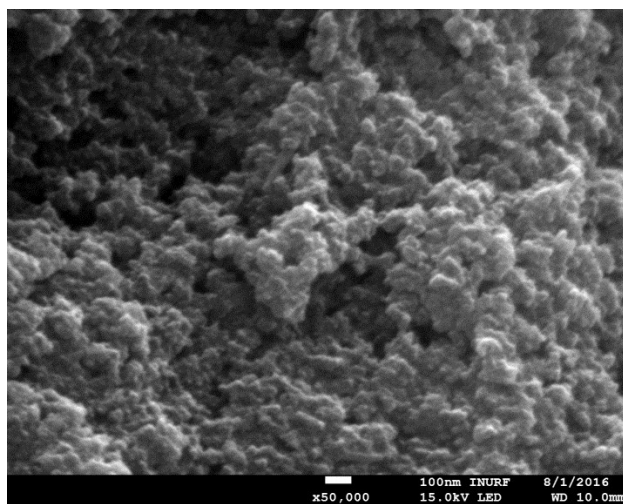

**Figure S1.** SEM image of Por-Py-CMP.

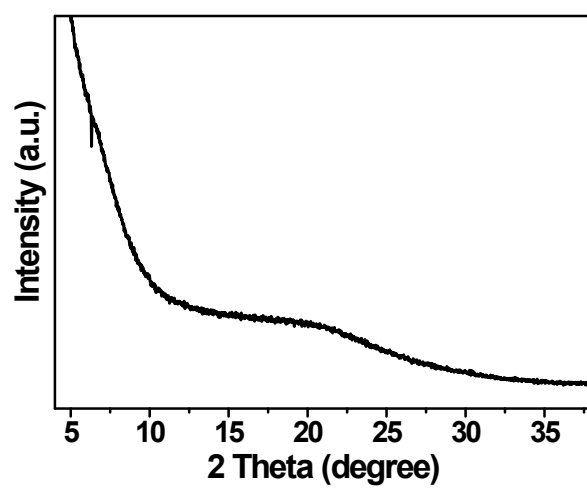

**Figure S2.** Powder X-ray diffraction pattern of Por-Py-CMP.

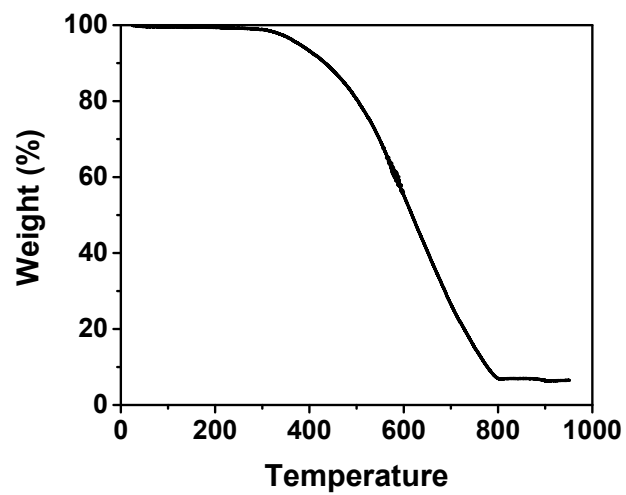

**Figure S3.** TGA data of Por-Py-CMP.

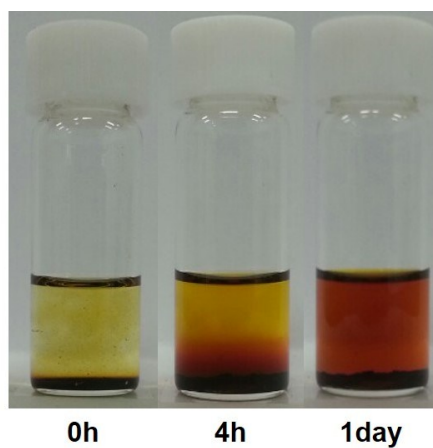

**Figure S4.** Iodine release from the I<sub>2</sub>@Por-Py-CMP in ethanol solution

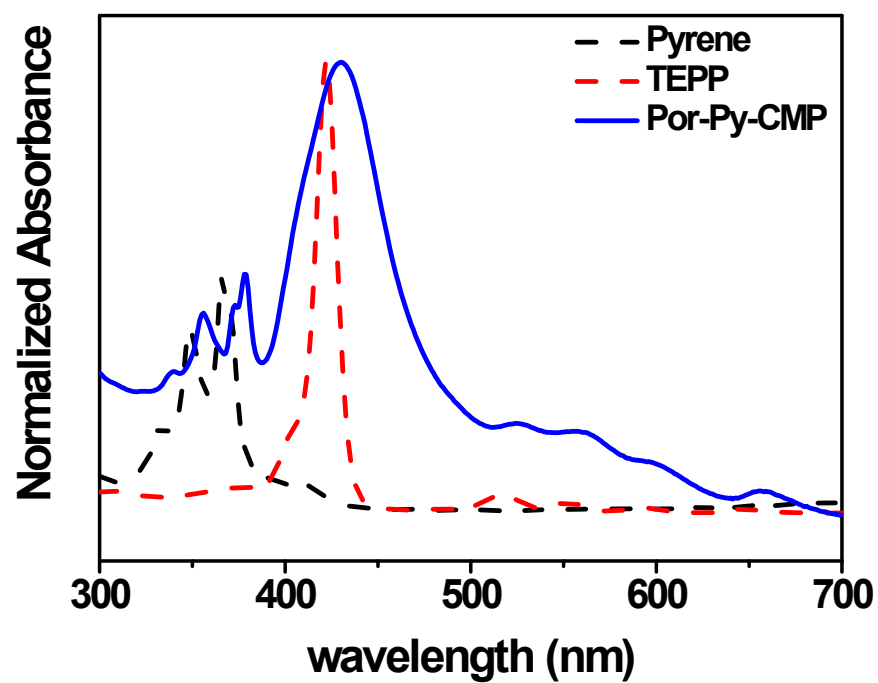

**Figure S5.** UV-Vis spectra of pyrene, TEPP, and Por-Py-CMP dispersed in DMF.

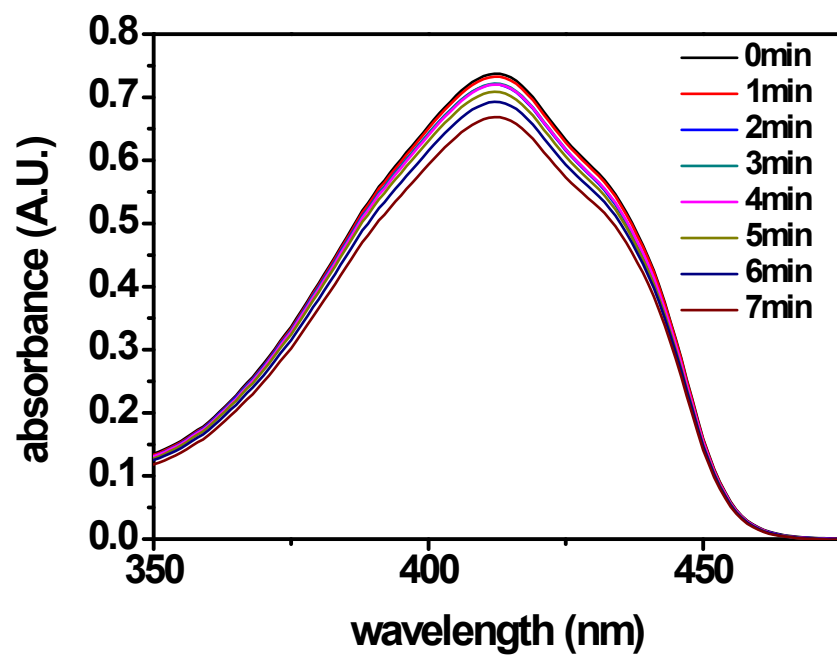

**Figure S6.** Time-dependent absorption spectra of DPBF upon irradiation without Por-Py-CMP

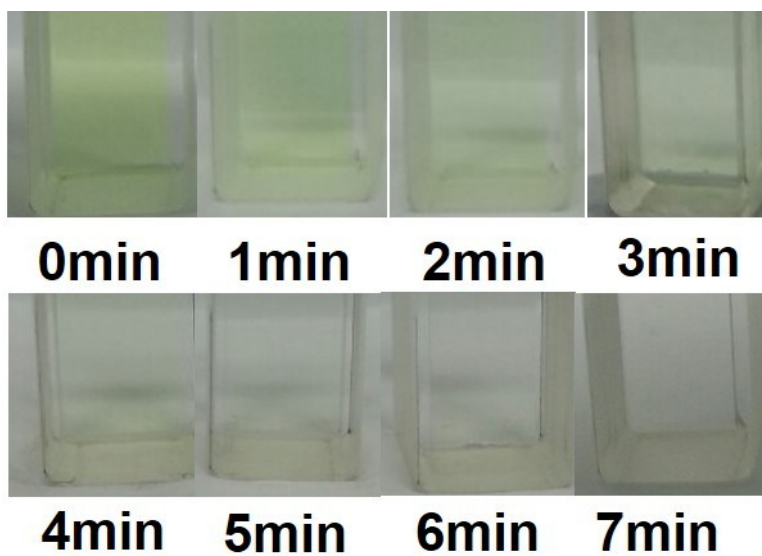

**Figure S7.** Photograph images of DPBF solution in the presence of Por-Py-CMP during the irradiation.
